# Supplementary material for: Lipidomic Profiling Identifies Signatures of Poor Cardiovascular Health
Source: MDPI journal article supplement (doi:10.3390/metabo11110747), 2021-10-29

**Table S1.** Distribution of CVH metrics among 461 Kardiovize participants

| CVH metric            | Poor  | Intermediate | Ideal |
|-----------------------|-------|--------------|-------|
| Smoking status        | 18.0% | 27.3%        | 54.7% |
| Healthy dietary score | 3.3%  | 96.7%        | -     |
| Physical activity     | 15.1% | 38.0%        | 46.9% |
| BMI                   | 10.0% | 41.2%        | 40.8% |
| Blood pressure        | 19.8% | 43.8%        | 36.4% |
| Total cholesterol     | 14.9% | 42.1%        | 43.0% |
| Fasting glucose       | 4.7%  | 16.6%        | 78.7% |

The parameters for each CVH metric are described in Table S7.

**Table S2.** Important lipid features identified by ANOVA analysis and Fisher's least significant difference method across CVH categories of smoking status

| Lipid species | F-statistic | P-value  | FDR      |
|---------------|-------------|----------|----------|
| LPE 22:6      | 6.4857      | 0.001669 | 0.049792 |
| PC 14:1_14:1  | 6.4227      | 0.001774 | 0.049792 |
| LPE 16:0      | 6.293       | 0.002013 | 0.049792 |
| PE 18:2_16:1  | 6.2086      | 0.002186 | 0.049792 |
| PE 18:0_18:0  | 6.0808      | 0.002475 | 0.049792 |
| LPE 20:5      | 5.9263      | 0.002877 | 0.049792 |

**Table S3.** Important lipid features identified by ANOVA analysis and Fisher's least significant difference method across CVH categories of blood pressure

| Lipid species | F-statistic | P-value  | FDR      |
|---------------|-------------|----------|----------|
| PE 18:0_20:5  | 11.694      | 1.11E-05 | 0.001038 |
| PE 18:0_22:4  | 10.727      | 2.80E-05 | 0.001038 |
| SM d18:1/18:1 | 10.655      | 3.00E-05 | 0.001038 |
| PE 16:0_18:1  | 10.396      | 3.84E-05 | 0.001038 |
| PE 16:0_16:1  | 10.116      | 5.02E-05 | 0.001085 |
| PC 18:0_20:5  | 9.4165      | 9.82E-05 | 0.001768 |
| PE 18:0_16:0  | 8.9346      | 0.000156 | 0.002408 |
| PE 18:1_20:1  | 8.7966      | 0.000178 | 0.002408 |
| PE 16:0_20:2  | 8.3629      | 0.000271 | 0.002926 |
| PE 16:0_20:3  | 8.3627      | 0.000271 | 0.002926 |
| PE 18:1_22:6  | 8.039       | 0.00037  | 0.003636 |
| LPE 20:5      | 7.9369      | 0.000409 | 0.003679 |
| LPC 20:5      | 7.7266      | 0.000501 | 0.004161 |
| PE 16:0_18:2  | 7.5371      | 0.000602 | 0.004642 |
| LPE 20:4      | 7.1707      | 0.000858 | 0.006179 |
| SM d18:1/14:0 | 6.9202      | 0.001094 | 0.007305 |
| PC 18:0_20:3  | 6.8691      | 0.00115  | 0.007305 |
| PE 16:0_20:1  | 6.7923      | 0.001239 | 0.007434 |
| LPE 20:3      | 6.7106      | 0.001341 | 0.007624 |
| SM d18:1/20:1 | 6.5796      | 0.001523 | 0.008199 |
| PC 16:0_20:5  | 6.5328      | 0.001594 | 0.008199 |
| PE 18:0_18:0  | 6.2402      | 0.002119 | 0.010403 |

|                |        |          |          |
|----------------|--------|----------|----------|
| PC 18:0_20:0   | 5.9361 | 0.00285  | 0.013196 |
| PE 18:1_22:4   | 5.9068 | 0.002933 | 0.013196 |
| PE 18:2_20:5   | 5.7038 | 0.003575 | 0.01506  |
| PC 18:0_20:2   | 5.6279 | 0.003849 | 0.01506  |
| PE 18:2_16:1   | 5.6185 | 0.003885 | 0.01506  |
| PC 18:1_20:5   | 5.608  | 0.003925 | 0.01506  |
| PC 16:0_18:0   | 5.5774 | 0.004044 | 0.01506  |
| SM d18:1/16:0  | 5.5117 | 0.004312 | 0.015523 |
| SM d18:1/18:0  | 5.4601 | 0.004535 | 0.015798 |
| PC 16:0_16:1   | 5.2998 | 0.005304 | 0.0179   |
| PC 18:0_18:0   | 5.1826 | 0.005947 | 0.01894  |
| Cer d18:1/14:0 | 5.1543 | 0.006114 | 0.01894  |
| SM d18:1/20:0  | 5.1238 | 0.006299 | 0.01894  |
| PC 18:0_22:4   | 5.1215 | 0.006314 | 0.01894  |
| PE 18:2_20:1   | 5.0932 | 0.006491 | 0.018947 |
| PC 16:0_20:2   | 4.8536 | 0.008206 | 0.023323 |
| SM d18:1/22:1  | 4.8123 | 0.008545 | 0.023662 |
| LPE 20:2       | 4.7077 | 0.009467 | 0.025561 |
| LPE 18:3       | 4.5268 | 0.011304 | 0.029776 |
| LPE 16:1       | 4.4466 | 0.012229 | 0.030746 |
| PC 16:0_18:1   | 4.435  | 0.012368 | 0.030746 |
| LPC 22:6       | 4.4221 | 0.012526 | 0.030746 |
| PE 18:2_20:4   | 4.277  | 0.014443 | 0.034664 |
| SM d18:1/24:1  | 4.2298 | 0.015127 | 0.035517 |
| PE 16:0_16:0   | 4.0991 | 0.0172   | 0.039523 |
| LPE 22:5       | 4.0018 | 0.018926 | 0.042584 |
| SM d18:1/26:1  | 3.9074 | 0.020767 | 0.045652 |
| PC 18:1_22:5   | 3.8704 | 0.021535 | 0.045652 |
| PC 14:1_14:1   | 3.8693 | 0.021558 | 0.045652 |
| LPE 18:0       | 3.8001 | 0.023076 | 0.047927 |
| SM d18:1/24:0  | 3.7769 | 0.02361  | 0.048111 |

**Table S4.** Important lipid features identified by ANOVA analysis and Fisher's least significant difference method across CVH categories of total cholesterol

| Lipid species  | F-statistic | P-value  | FDR      |
|----------------|-------------|----------|----------|
| PC 18:0_20:5   | 11.295      | 1.63E-05 | 0.000905 |
| PE 18:0_20:5   | 11.265      | 1.68E-05 | 0.000905 |
| Cer d18:1/14:0 | 9.987       | 5.69E-05 | 0.002047 |
| PC 16:0_20:5   | 7.1388      | 0.000885 | 0.023903 |
| PE 18:1_22:6   | 6.6916      | 0.001367 | 0.029516 |

**Table S5.** Important lipid features identified by ANOVA analysis and Fisher's least significant difference method across CVH categories of blood fasting glucose

| Lipid species  | F-statistic | P-value  | FDR      |
|----------------|-------------|----------|----------|
| PE 18:1_22:6   | 7.5593      | 0.000589 | 0.026949 |
| PE 18:0_20:5   | 7.1709      | 0.000858 | 0.026949 |
| PE 18:0_22:4   | 6.9553      | 0.001058 | 0.026949 |
| LPE 20:3       | 6.7171      | 0.001333 | 0.026949 |
| LPE 20:4       | 6.5234      | 0.001609 | 0.026949 |
| PC 16:0_20:5   | 6.4964      | 0.001652 | 0.026949 |
| PC 18:0_20:5   | 6.4391      | 0.001747 | 0.026949 |
| PC 18:1_20:5   | 6.2336      | 0.002133 | 0.028798 |
| LPE 20:2       | 5.9228      | 0.002888 | 0.033241 |
| PE 18:1_20:1   | 5.8573      | 0.003078 | 0.033241 |
| PE 16:0_18:1   | 5.5919      | 0.003988 | 0.033887 |
| PE 18:1_22:4   | 5.4416      | 0.004618 | 0.033887 |
| PE 18:2_20:1   | 5.4217      | 0.004709 | 0.033887 |
| PE 16:0_16:1   | 5.3999      | 0.00481  | 0.033887 |
| PE 16:0_20:3   | 5.321       | 0.005195 | 0.033887 |
| PE 18:0_18:0   | 5.2357      | 0.005647 | 0.033887 |
| Cer d18:1/14:0 | 5.2053      | 0.005817 | 0.033887 |
| PC 18:0_18:0   | 5.2002      | 0.005846 | 0.033887 |
| PE 16:0_20:2   | 5.1803      | 0.005962 | 0.033887 |

**Table S6.** Important lipid features identified by ANOVA analysis and Fisher's least significant difference method across categories of CVH

| Lipid species | F-statistic | P-value  | FDR      |
|---------------|-------------|----------|----------|
| PE 18:0_20:5  | 14.581      | 7.27E-07 | 5.05E-05 |
| PE 18:0_22:4  | 14.154      | 1.09E-06 | 5.05E-05 |
| PE 16:0_16:1  | 13.882      | 1.40E-06 | 5.05E-05 |
| PC 18:0_20:5  | 11.423      | 1.44E-05 | 0.000389 |
| PE 16:0_20:3  | 10.468      | 3.59E-05 | 0.000703 |
| PE 16:0_18:1  | 10.379      | 3.91E-05 | 0.000703 |
| PC 16:0_20:5  | 9.7656      | 7.03E-05 | 0.001085 |
| PC 16:0_16:1  | 9.4294      | 9.71E-05 | 0.001311 |
| LPE 20:3      | 8.6153      | 0.000212 | 0.002383 |
| SM d18:1/18:1 | 8.5758      | 0.000221 | 0.002383 |
| PE 18:1_22:6  | 8.3384      | 0.000277 | 0.002686 |
| PE 18:1_22:4  | 8.1654      | 0.000328 | 0.002686 |
| PC 18:0_20:3  | 8.1489      | 0.000333 | 0.002686 |
| PE 16:0_18:2  | 8.103       | 0.000348 | 0.002686 |
| PC 18:1_20:5  | 7.4499      | 0.000655 | 0.004715 |
| LPC 20:5      | 7.3316      | 0.000734 | 0.004778 |
| PE 18:0_16:0  | 7.3071      | 0.000752 | 0.004778 |
| PC 18:0_22:4  | 7.209       | 0.000827 | 0.004962 |
| PE 18:0_18:0  | 7.1407      | 0.000884 | 0.005023 |
| SM d18:1/14:0 | 7.0697      | 0.000947 | 0.005112 |

|               |        |          |          |
|---------------|--------|----------|----------|
| PE 16:0_20:2  | 7.0128 | 0.001001 | 0.005145 |
| LPE 20:4      | 6.5918 | 0.001506 | 0.007391 |
| PE 18:1_20:1  | 6.3393 | 0.001925 | 0.009038 |
| LPE 18:3      | 6.2436 | 0.002113 | 0.009507 |
| PC 18:0_20:2  | 6.0582 | 0.002531 | 0.010932 |
| PE 16:0_16:0  | 5.918  | 0.002901 | 0.011818 |
| LPE 16:1      | 5.8982 | 0.002958 | 0.011818 |
| PE 18:2_20:5  | 5.862  | 0.003064 | 0.011818 |
| LPE 18:1      | 5.6719 | 0.003688 | 0.013735 |
| PC 18:0_20:0  | 5.5107 | 0.004317 | 0.015228 |
| PE 18:2_16:1  | 5.4706 | 0.004489 | 0.015228 |
| LPE 20:2      | 5.4654 | 0.004512 | 0.015228 |
| PC 16:0_22:4  | 5.4051 | 0.004785 | 0.015661 |
| PC 18:1_22:4  | 5.1196 | 0.006326 | 0.019653 |
| PC 16:0_20:2  | 5.1127 | 0.006369 | 0.019653 |
| PE 18:2_20:4  | 5.0349 | 0.006872 | 0.020312 |
| PE 18:2_20:1  | 5.0221 | 0.006959 | 0.020312 |
| PC 16:0_18:0  | 4.9842 | 0.007222 | 0.020526 |
| PC 18:1_22:5  | 4.7424 | 0.009152 | 0.025343 |
| PC 16:1_18:2  | 4.6256 | 0.010261 | 0.027706 |
| PC 18:0_18:0  | 4.5757 | 0.010775 | 0.028374 |
| PC 16:0_18:1  | 4.5515 | 0.011034 | 0.028374 |
| PC 18:1_18:3  | 4.4249 | 0.012492 | 0.031376 |
| PE 18:2_22:6  | 4.3549 | 0.01338  | 0.032843 |
| SM d18:1/24:1 | 4.3245 | 0.013787 | 0.033088 |
| LPC 22:4      | 4.2517 | 0.014807 | 0.034764 |
| PE 16:0_20:1  | 4.2147 | 0.015355 | 0.035182 |
| PC 18:2_20:5  | 4.1962 | 0.015636 | 0.035182 |
| LPC 20:4      | 4.171  | 0.016029 | 0.035329 |
| LPE 18:2      | 4.1044 | 0.017112 | 0.036962 |
| SM d18:1/16:0 | 3.9572 | 0.019775 | 0.041876 |
| LPC 22:5      | 3.8649 | 0.021654 | 0.044174 |
| SM d18:1/18:0 | 3.8553 | 0.021858 | 0.044174 |
| LPC 20:3      | 3.8448 | 0.022087 | 0.044174 |
| LPC 16:1      | 3.785  | 0.023424 | 0.045997 |
| PE 18:2_18:2  | 3.6614 | 0.026454 | 0.049626 |
| LPC 20:2      | 3.6559 | 0.026596 | 0.049626 |
| LPE 20:5      | 3.6538 | 0.026651 | 0.049626 |
| LPC 22:6      | 3.6347 | 0.027159 | 0.049714 |

Table S7. Definition of cardiovascular health metrics.

| Health Metric         |                                       | Definition                                                                                                                                                                                |
|-----------------------|---------------------------------------|-------------------------------------------------------------------------------------------------------------------------------------------------------------------------------------------|
| Smoking               | Ideal<br>Intermediate<br>Poor         | Never or quit > 12 months<br>Former ≤ 12 months<br>Current                                                                                                                                |
| Body mass index       | Ideal<br>Intermediate<br>Poor         | < 25kg/m <sup>2</sup><br>25-29.9 kg/m <sup>2</sup><br>≥ 30 kg/m <sup>2</sup>                                                                                                              |
| Physical Activity     | Ideal<br><br>Intermediate<br><br>Poor | ≥ 150 min/week moderate, ≥ 75 min/week vigorous or ≥ 150 min/week moderate + vigorous<br>1–149 min/ week moderate or 1–74 min/week vigorous or 1–149 min/week moderate + vigorous<br>None |
| Fasting serum glucose | Ideal<br>Intermediate<br>Poor         | < 5.55 mmol/l, without treatment<br>5.55-6.94 mmol/l or treated to 5.5 mmol/l<br>≥ 6.95 mmol/l                                                                                            |
| Total cholesterol     | Ideal<br>Intermediate<br>Poor         | < 5.17 mmol/l without medication<br>5.17-6.18 mmol/l, or treated to < 5.17 mmol/l<br>≥ 6.19 mmol/l                                                                                        |
| Blood Pressure        | Ideal<br>Intermediate<br>Poor         | SBP < 120 and DBP < 80 mmHg, without medication<br>SBP 120-139 or DBP 80-89 mmHg, or treated to hypertension<br>SBP ≥ 140 or DBP ≥ 90 mmHg                                                |
| Healthy diet score    | Ideal<br>Intermediate<br>Poor         | 4-5 components<br>2-3 components<br>0-1 component                                                                                                                                         |
|                       | <b>COMPONENTS:</b>                    | A) ≥ 4,5 cups/day of fruits and vegetables                                                                                                                                                |
|                       |                                       | B) ≥ 2 servings/week of fish                                                                                                                                                              |
|                       |                                       | C) ≥ 3 servings/day of whole grains                                                                                                                                                       |
|                       |                                       | D) < 1500 mg/day of sodium                                                                                                                                                                |
|                       |                                       | E) 450 kcal (or 1 litre)/week of sweet/sugar sweetened beverages                                                                                                                          |

Medina-Inojosa JR, Vinciguerra M, Maugeri A, Kunzova S, Sochor O, Movsisyan N, Geda YE, Stokin GB, Lopez-Jimenez F. Prevalence of ideal cardiovascular health in a Central European community: results from the Kardiovize Brno 2030 Project. Eur J Prev Cardiol. 2020; 27(4):441-443.

**Figure S1.** ANOVA analysis of lipid species across CVH categories of smoking status. Lipid species with adjusted *P*-value (FDR) <0.05 are indicated in red.

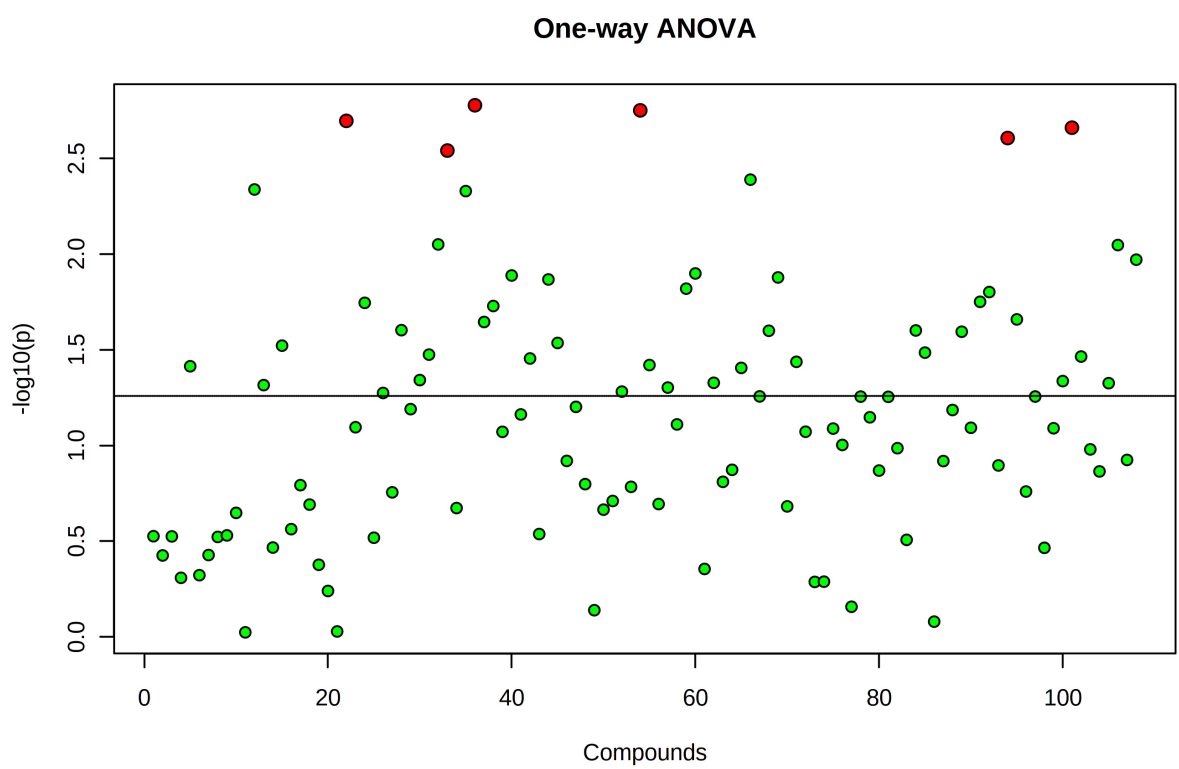

**Figure S2.** ANOVA analysis of lipid species across CVH categories of physical activity.

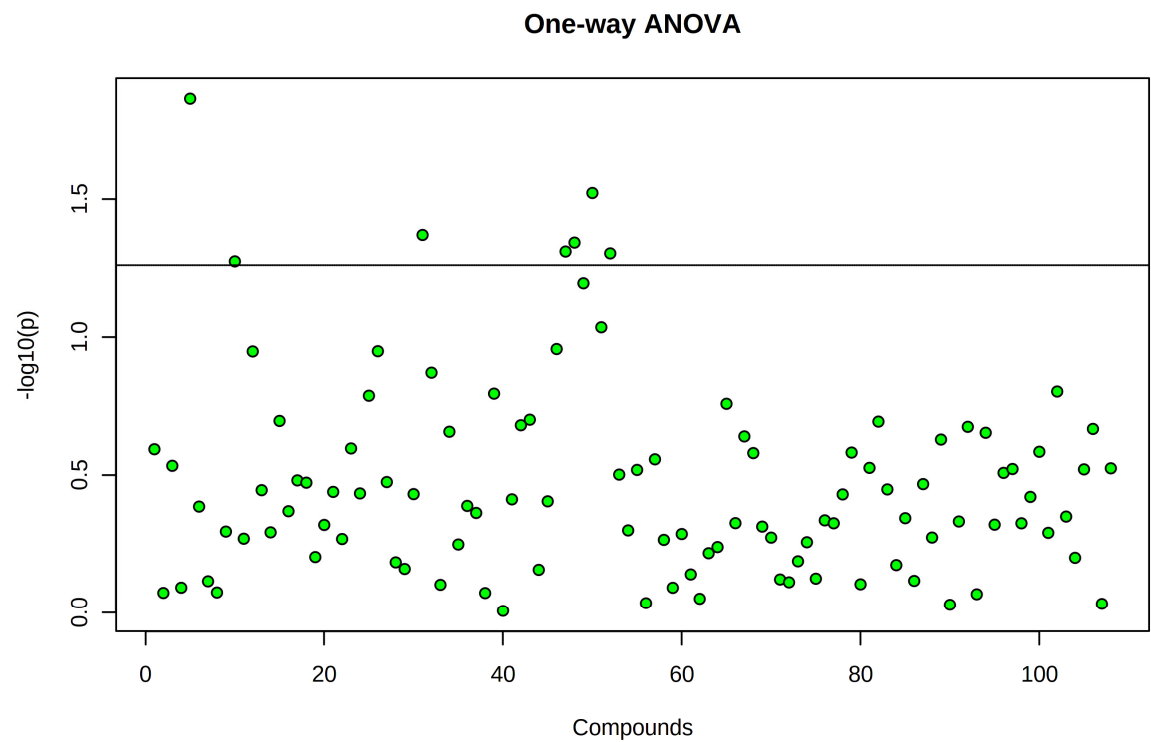

**Figure S3.** ANOVA analysis of lipid species across CVH categories of BMI.

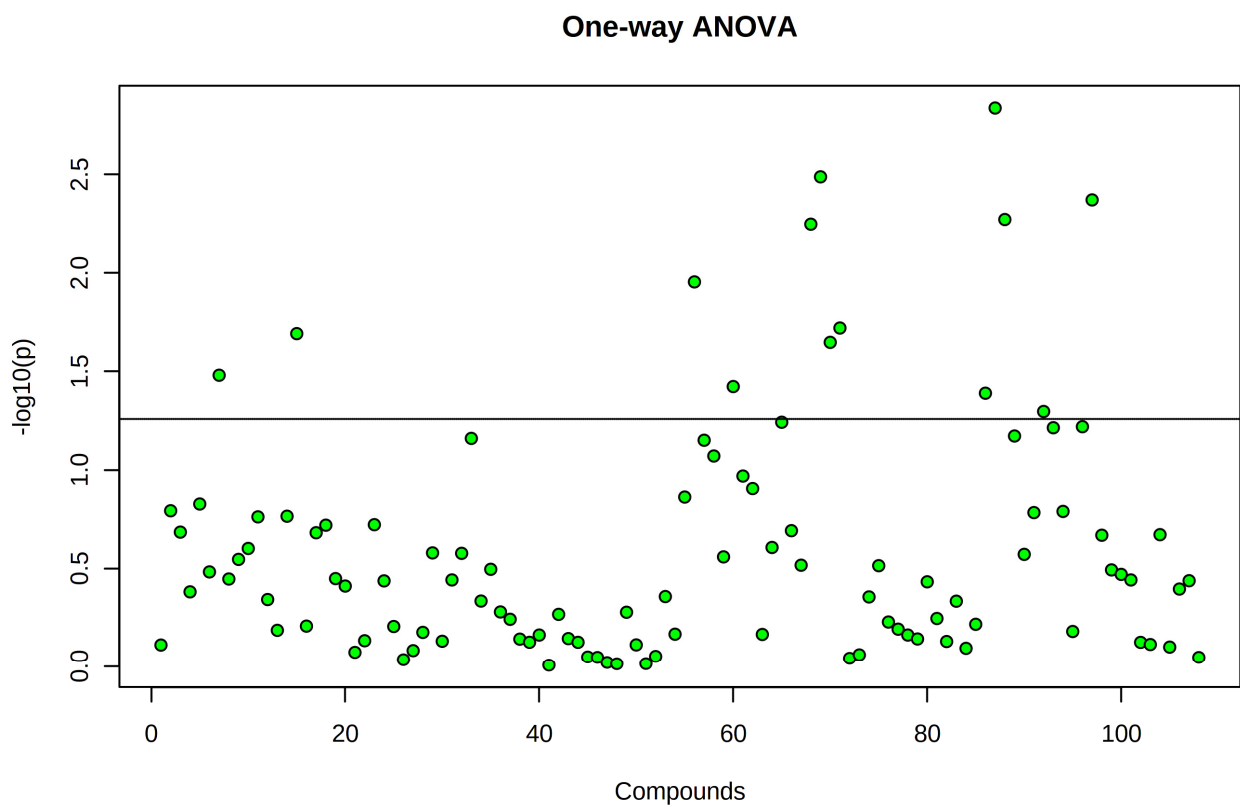

**Figure S4.** ANOVA analysis of lipid species across CVH categories of blood pressure. Lipid species with adjusted *P*-value (FDR) <0.05 are indicated in red.

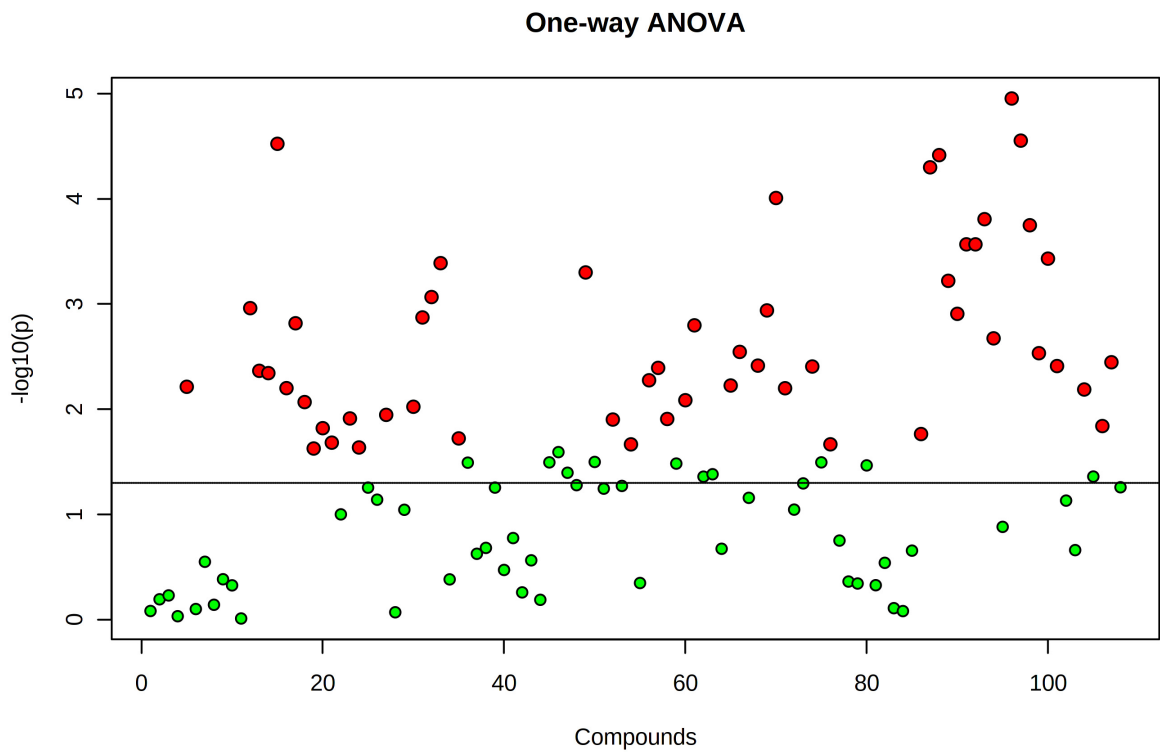

**Figure S5.** ANOVA analysis of lipid species across CVH categories of total cholesterol. Lipid species with adjusted *P*-value (FDR) <0.05 are indicated in red.

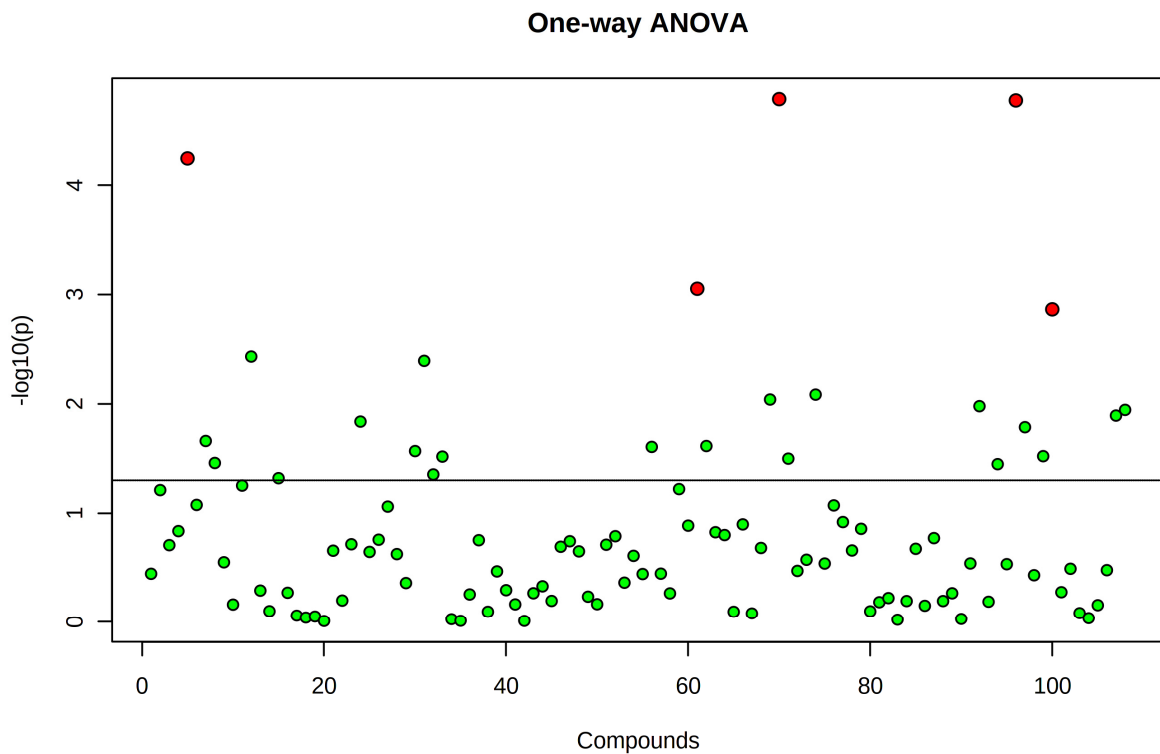



**Figure S6.** ANOVA analysis of lipid species across CVH categories of blood fasting glucose. Lipid species with adjusted *P*-value (FDR) <0.05 are indicated in red.

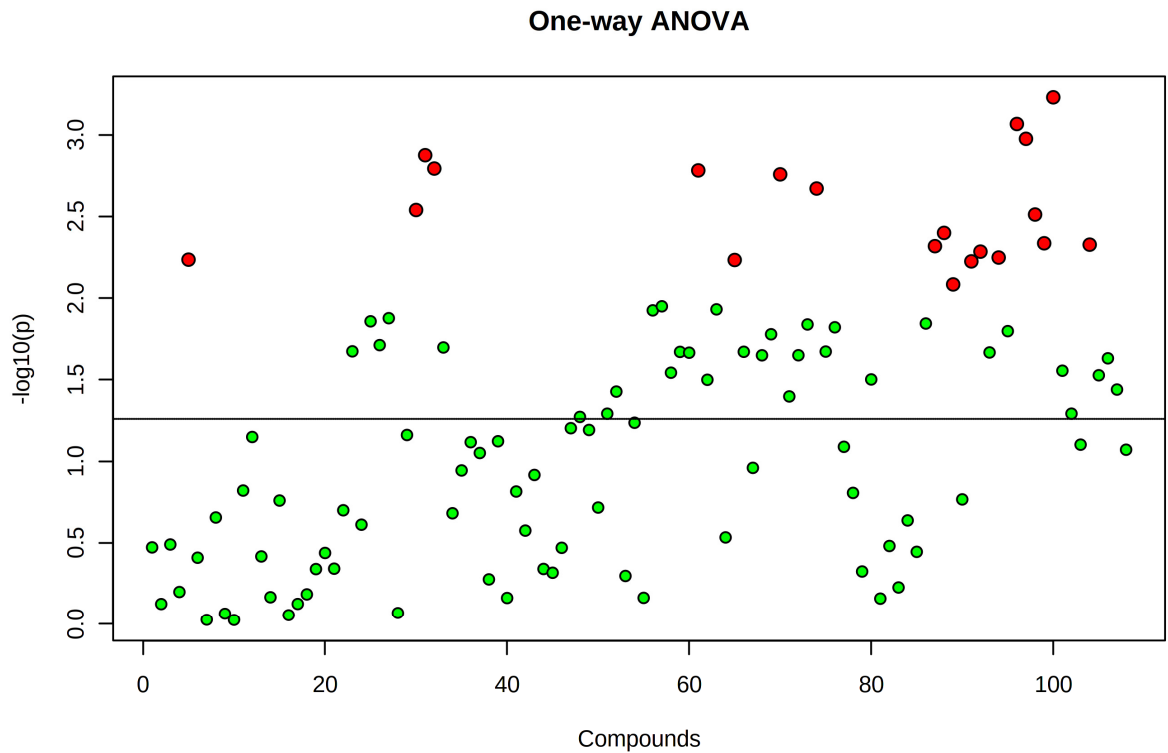

**Figure S7.** ANOVA analysis of lipid species across categories of CVH. Lipid species with adjusted *P*-value (FDR) <0.05 are indicated in red.

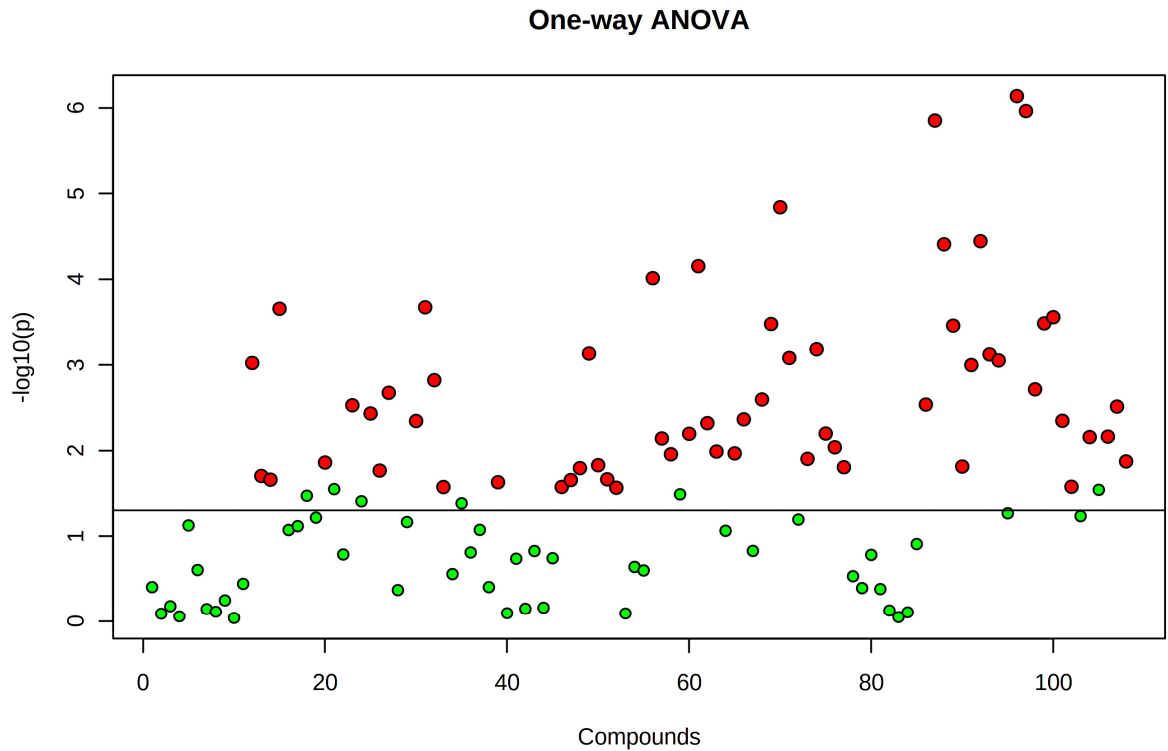

**Figure S8.** Classification performance and permutation test of the PLS-DA. (A) PLS-DA classification using different number of components. The red star indicates the best classifier. (B) PLS-DA model validation by permutation tests based on separation distance.

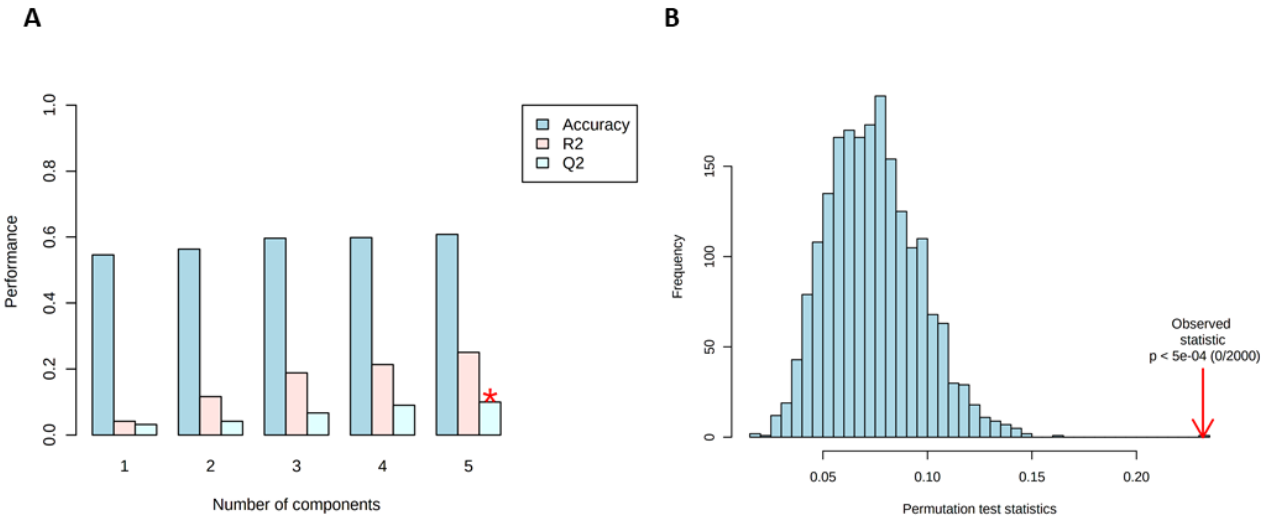

Supplement: s1 [file s1]
